# Supplementary material
Source: PubMed Central journal article supplement (PMC2719411)
Supplement: supp_M109.005447_jbc.M109.005447-1.pdf [file supp_M109.005447_jbc.M109.005447-1.pdf]

Supplemental Figure S1

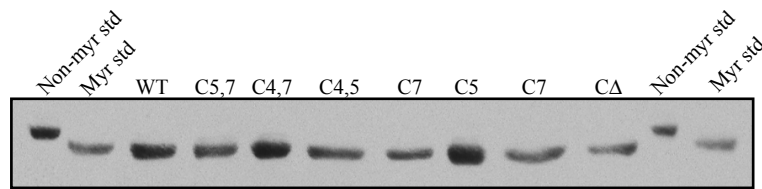

**Supplemental Figure S1. *N*-myristoylation status of Vac8 mutants assessed by mobility shift.**

Vac8-myc WT and cysteine mutants were partially purified from *E. coli* coexpressing Nmt1 as described in Experimental Procedures. The proteins were resolved on a 7.5% acrylamide gel with 4 M urea and analyzed by anti-myc immunoblot. Non-myristoylated and *N*-myristoylated standards were prepared from soluble lysates of *E. coli* expressing Vac8-myc in the absence or presence of Nmt1. The partially purified proteins have a similar mobility to that of the myristoylated standard suggesting that the Vac8-myc WT and cysteine mutant preparations are fully myristoylated.

Supplemental Figure S2

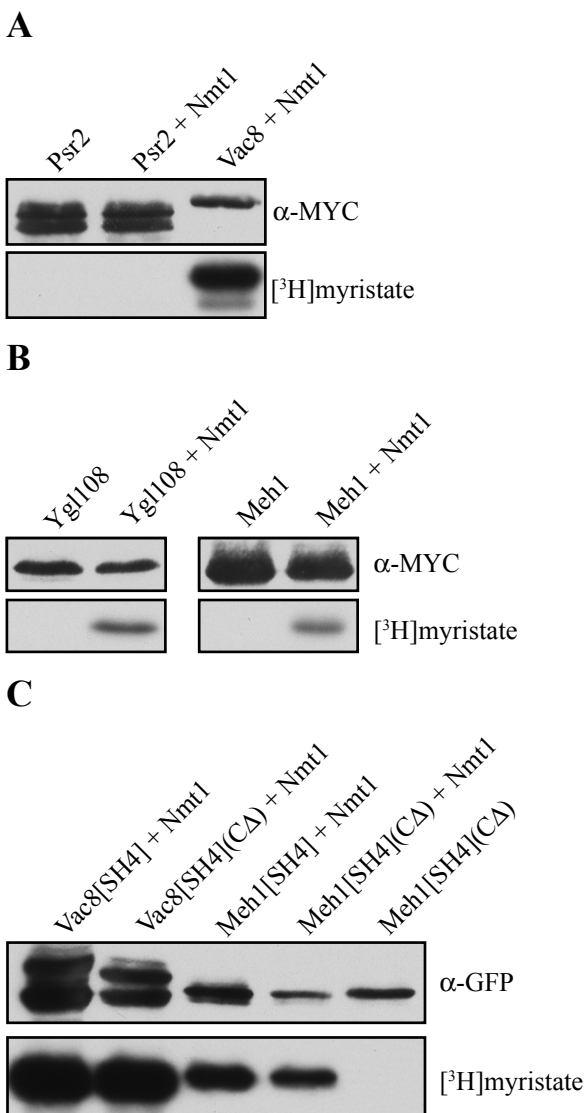

Supplemental Figure S2. **N-myristoylation of substrates in *E. coli*.** (A) *E. coli* BL21(DE3) were transformed with pML1164 (*PSR2-MYC-6xHIS*), pML1164 and pBB131 (*NMT1*), or pML658 (*VAC8-MYC*) and pBB131. Cultures (50 ml) were grown to  $OD_{600} = 0.4$  and induced with 0.3 mM IPTG in the presence of 1  $\mu$ g/ml chloramphenicol for 60 min at 30°C. Each culture (1 ml) was incubated with 1.2 nmol (50  $\mu$ Ci) [ $^3$ H]myristic acid for 4 h at 30°C. Cells were collected, suspended in 100  $\mu$ l lysis buffer (50 mM Tris, pH 8.0, 1 mM EDTA, 1 mM DTT, 2 mg/ml lysozyme, 1x PTT), incubated on ice for 30 min and fractionated at 200,000g for 20 min. The soluble fraction was collected and equal volumes from each condition were separated by SDS-PAGE and prepared for fluorography. Vac8-myc, but not Psr2-myc-6xHis, was radiolabeled with [ $^3$ H]myristate. Psr2-myc-6xHis is present in lanes 1 and 2, and Vac8-myc is present in lane 3 as shown by anti-myc immunoblot. (B) Ygl108 and Meh1 were analyzed for N-myristoylation as described in A. Both incorporated [ $^3$ H]myristate when coexpressed with Nmt1 in *E. coli*. (C) Vac8[SH4], Vac8[SH4](CΔ), Meh1[SH4], and Meh1[SH4](CΔ) were analyzed for N-myristoylation as described in A. All incorporated [ $^3$ H]myristate when coexpressed with Nmt1 in *E. coli*.

# Supplemental Figure S3

**A**

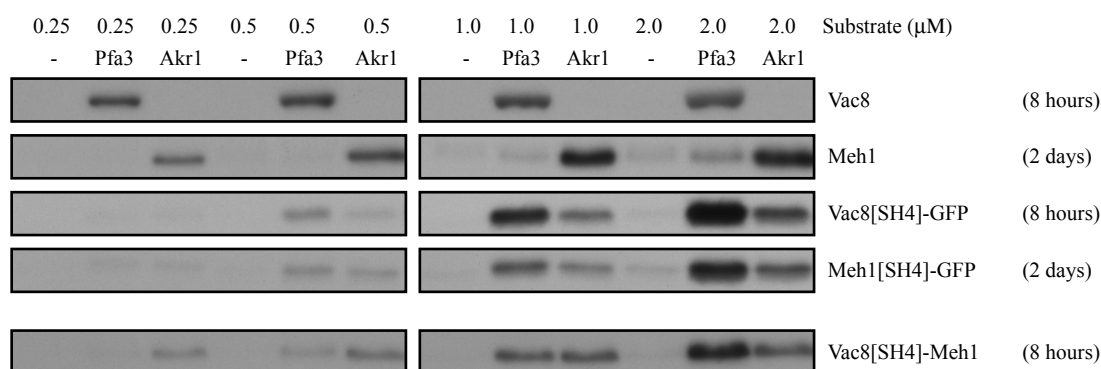

**B**

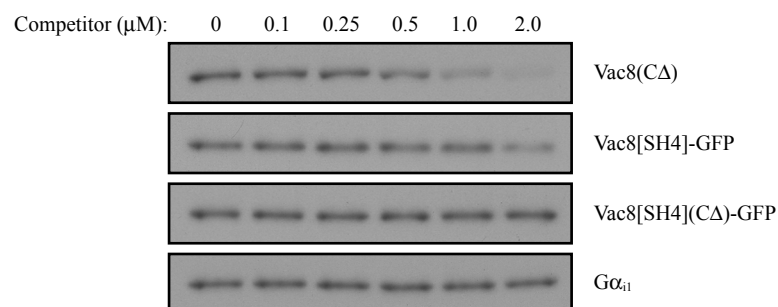

**C**

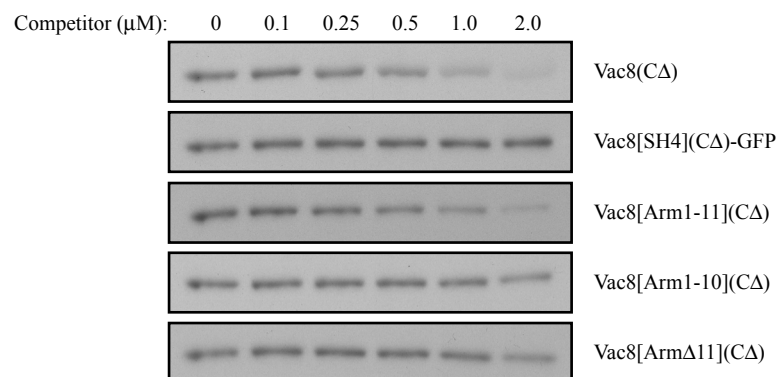

Supplemental Figure S3. (A) **Representative fluorograph from data in Figure 4 and 5b.** Increasing amounts of myr-Vac8, myr-Meh1, myr-Vac8[SH4]-GFP, myr-Meh1[SH4]-GFP, myr-Vac8[SH4]-Meh1, or myr-Meh1[SH4]-Vac8 were incubated with [<sup>3</sup>H]Palm-CoA and either no enzyme, 10 nM Pfa3-Flag, or 10 nM Akr1-Flag. Reactions were processed for fluorography and exposed to film for the time indicated to the right of each panel. (B) **Representative fluorograph from data in Figure 6a.** Increasing amounts of myr-Vac8(CΔ), myr-Vac8[SH4]-GFP, myr-Vac8[SH4](CΔ)-GFP, or myr-Gα<sub>i1</sub> were incubated with 0.1 μM myr-Vac8, [<sup>3</sup>H]Palm-CoA, and partially purified Pfa3-6xHis-Flag. Reactions were processed for fluorography and exposed to film for 4 h. (C) **Representative fluorograph from data in Figure 6b.** Increasing amounts of myr-Vac8(CΔ), myr-Vac8[SH4](CΔ)-GFP, myr-Vac8[Arm1-11](CΔ), myr-Vac8[Arm1-10](CΔ), or myr-Vac8[ArmΔ11](CΔ) were incubated with 0.1 μM myr-Vac8, [<sup>3</sup>H]Palm-CoA, and partially purified Pfa3-6xHis-Flag. Reactions were processed for fluorography and exposed to film for 4 h.

STable I. 100% values for densitometry in Figure 4 & 5B

| <b>Figure 4 - Substrate</b>  | <b>Expt</b> | <b>Arbitrary Units</b> |
|------------------------------|-------------|------------------------|
| <b>A. Myr-Vac8</b>           | 1           | 3008                   |
|                              | 2           | 3430                   |
|                              | 3           | 6311                   |
| <b>B. Myr-Vac8[SH4]-GFP</b>  | 1           | 32072                  |
|                              | 2           | 25512                  |
|                              | 3           | 38416                  |
| <b>C. Myr-Meh1</b>           | 1           | 14036                  |
|                              | 2           | 10444                  |
|                              | 3           | 9660                   |
| <b>D. Myr-Meh1[SH4]-GFP</b>  | 1           | 4708                   |
|                              | 2           | 8916                   |
|                              | 3           | 4876                   |
| <b>Figure 5 - Substrate</b>  | <b>Expt</b> | <b>Arbitrary Units</b> |
| <b>B. Myr-Meh1[SH4]-Vac8</b> | 1           | 4932                   |
|                              | 2           | 3991                   |
|                              | 3           | 2667                   |

STable II. 100% values for densitometry in Figure 6A.

| Competitor                | Expt | Arbitrary Units |
|---------------------------|------|-----------------|
| Myr-Vac8(CΔ) (●)          | 1    | 1791            |
|                           | 2    | 4198            |
|                           | 3    | 6374            |
| Myr-Vac8[SH4]-GFP (▲)     | 1    | 1291            |
|                           | 2    | 3894            |
|                           | 3    | 6093            |
| Myr-Vac8[SH4](CΔ)-GFP (■) | 1    | 2183            |
|                           | 2    | 4352            |
|                           | 3    | 6480            |
| Myr -Gα <sub>i1</sub> (◆) | 1    | 2797            |
|                           | 2    | 3911            |
|                           | 3    | 5863            |

STable III. 100% values for densitometry in Figure 6B.

| Competitor                | Expt | Arbitrary Units |
|---------------------------|------|-----------------|
| Myr-Vac8(CΔ) (●)          | 1    | 3674            |
|                           | 2    | 1913            |
|                           | 3    | 4849            |
| Myr-Vac8[SH4](CΔ)-GFP (■) | 1    | 3880            |
|                           | 2    | 2107            |
|                           | 3    | 4949            |
| Myr-Vac8[Arm1-11](CΔ) (△) | 1    | 3815            |
|                           | 2    | 2068            |
|                           | 3    | 4497            |
| Myr-Vac8[Arm1-10](CΔ) (◇) | 1    | 4002            |
|                           | 2    | 1956            |
|                           | 3    | 4775            |
| MyrVac8[ArmΔ11](CΔ) (□)   | 1    | 3870            |
|                           | 2    | 1966            |
|                           | 3    | 4830            |
